# Supplementary material
Source: PubMed Central journal article supplement (PMC6091687)

# Morris et al. Figure S3.

**A**

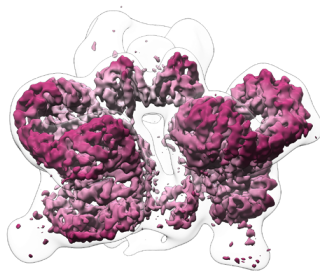

b-factor:  $-125 \text{ \AA}^2$   
FSC<sup>0.143</sup>:  $4.27 \text{ \AA}$

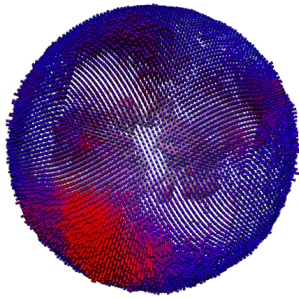

CryoEF score: 0.78  
3DFSC sphericity: 0.96

**B**

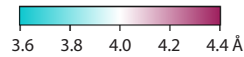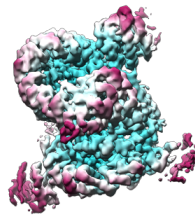

b-factor:  $-137 \text{ \AA}^2$   
FSC<sup>0.143</sup>:  $3.73 \text{ \AA}$

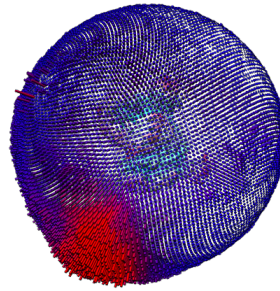

CryoEF score: 0.76  
3DFSC sphericity: 0.99

**C**

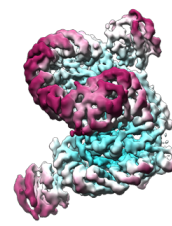

b-factor:  $-94 \text{ \AA}^2$   
FSC<sup>0.143</sup>:  $3.90 \text{ \AA}$

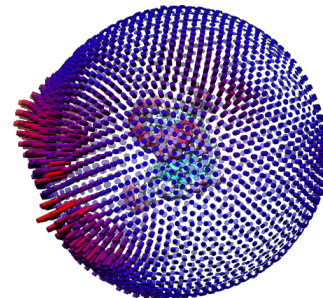

CryoEF score: 0.77  
3DFSC sphericity: 0.97

**D**

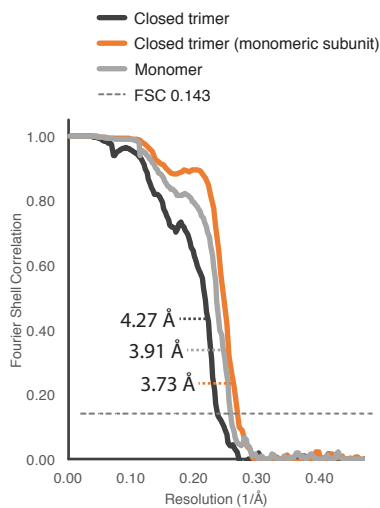

**E**

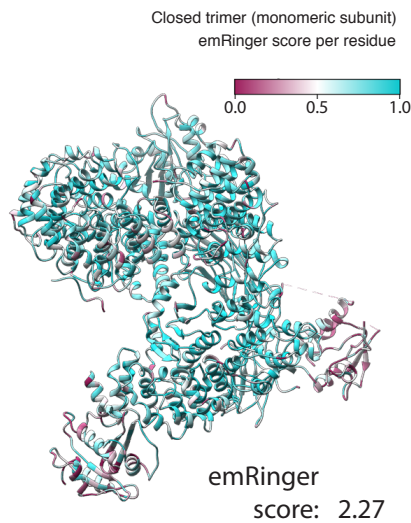

**F**

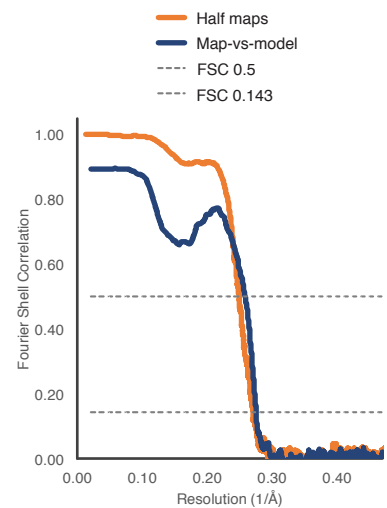

**G**

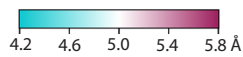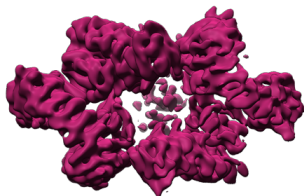

b-factor:  $-399 \text{ \AA}^2$   
FSC<sup>0.143</sup>:  $6.72 \text{ \AA}$

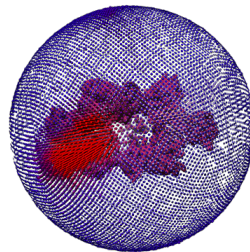

CryoEF score: 0.47  
3DFSC sphericity: 0.97

**H**

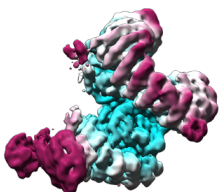

b-factor:  $-151 \text{ \AA}^2$   
FSC<sup>0.143</sup>:  $4.27 \text{ \AA}$

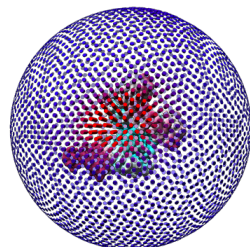

CryoEF score: 0.46  
3DFSC sphericity: 0.77

**I**

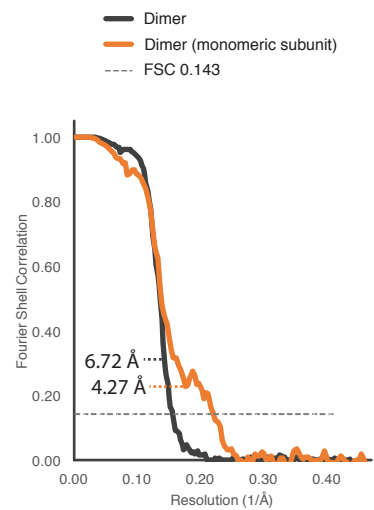

Supplement: NIHMS1500360-supplement-3.pdf [file NIHMS1500360-supplement-3.pdf]
