# Supplementary material
Source: PubMed Central journal article supplement (PMC6091687)

# Morris et al. Figure S1.

## A

### Trimer image classification workflow

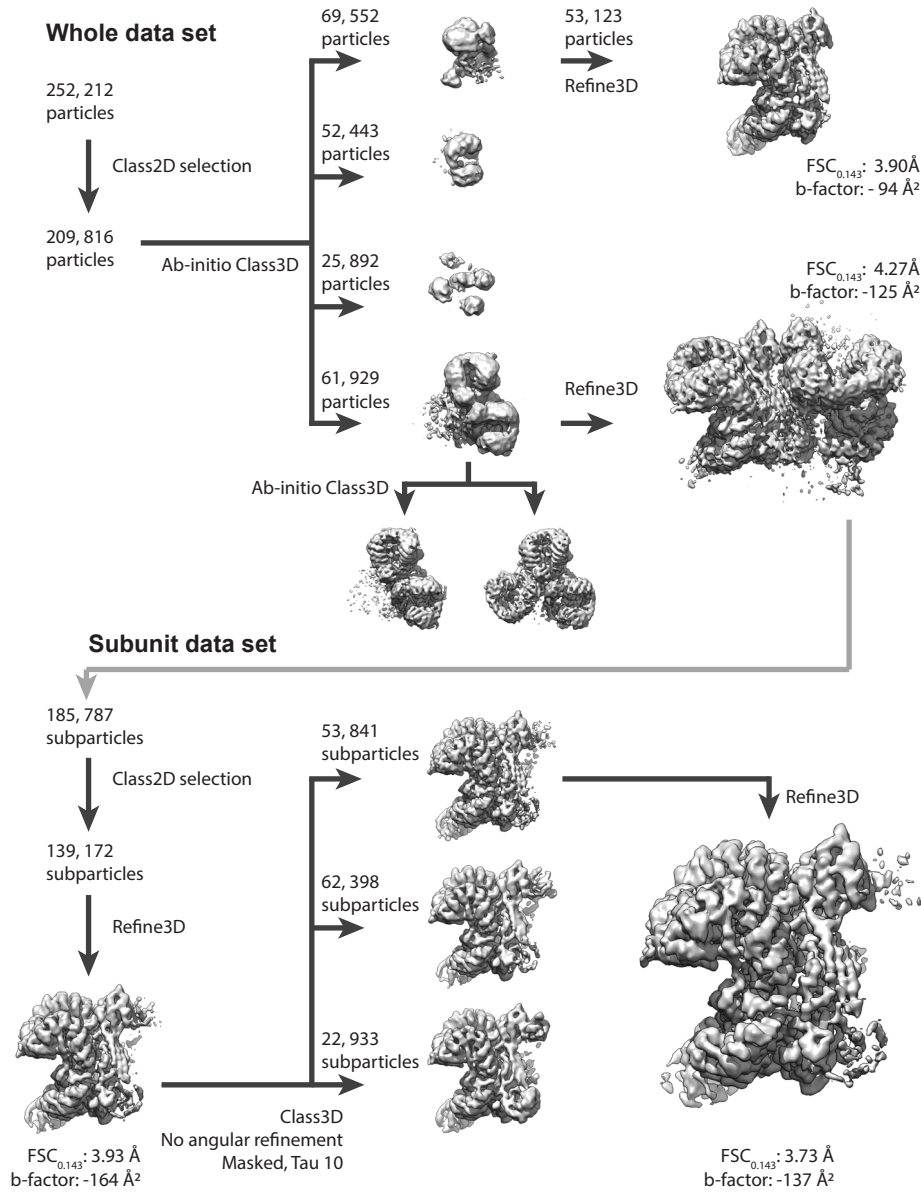

## B

### Dimer image classification workflow

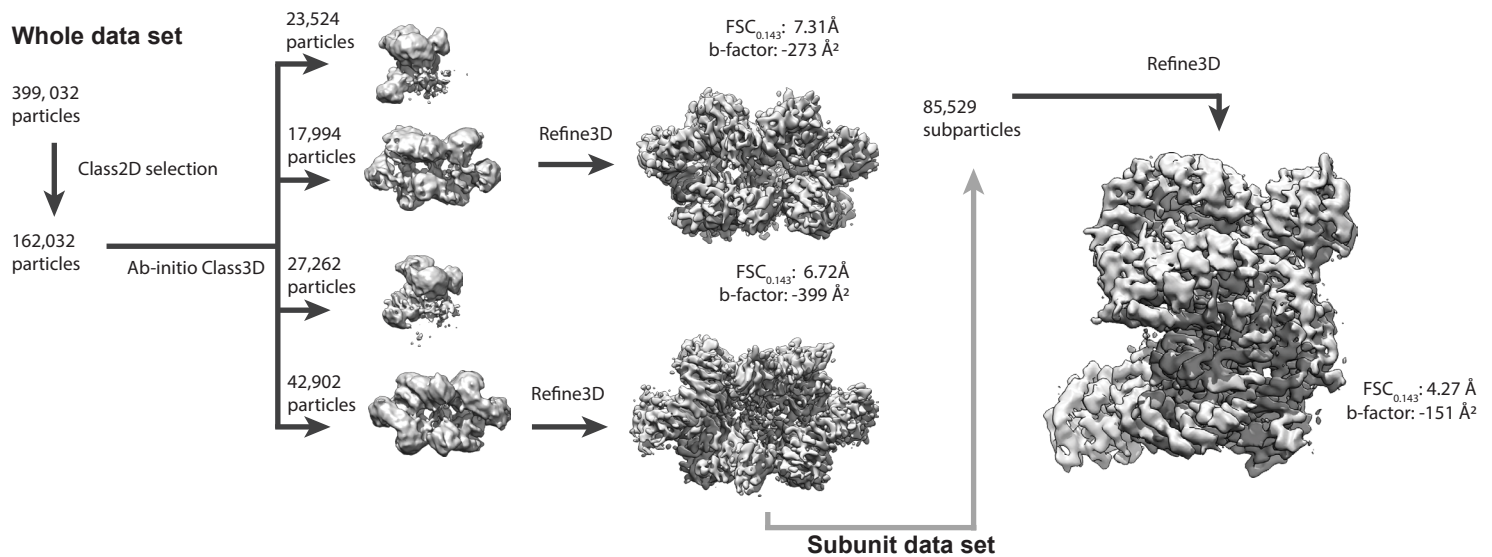

Supplement: NIHMS1500360-supplement-1.pdf [file NIHMS1500360-supplement-1.pdf]
