# Supplementary material
Source: PubMed Central journal article supplement (PMC6091687)

# Morris et al. Figure S6.

## A

### Tetherin-Nef:MBP- $\mu$ 1-CTD

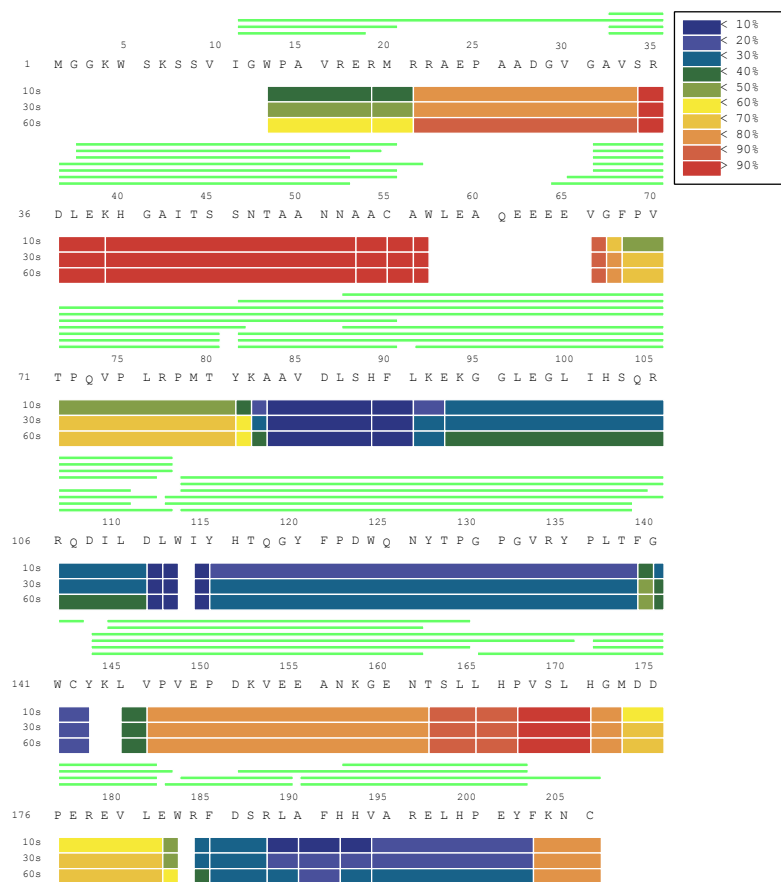

## B

### MHC-Nef:MBP- $\mu$ 1-CTD

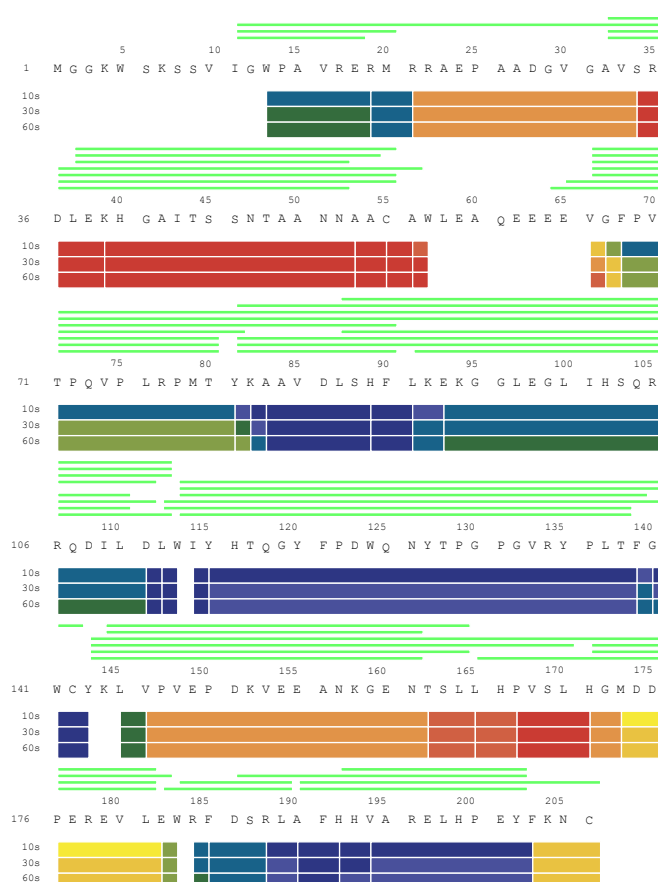

## C HDX difference (MHC-Nef) – (tetherin-Nef) upon $\mu$ 1-CTD binding

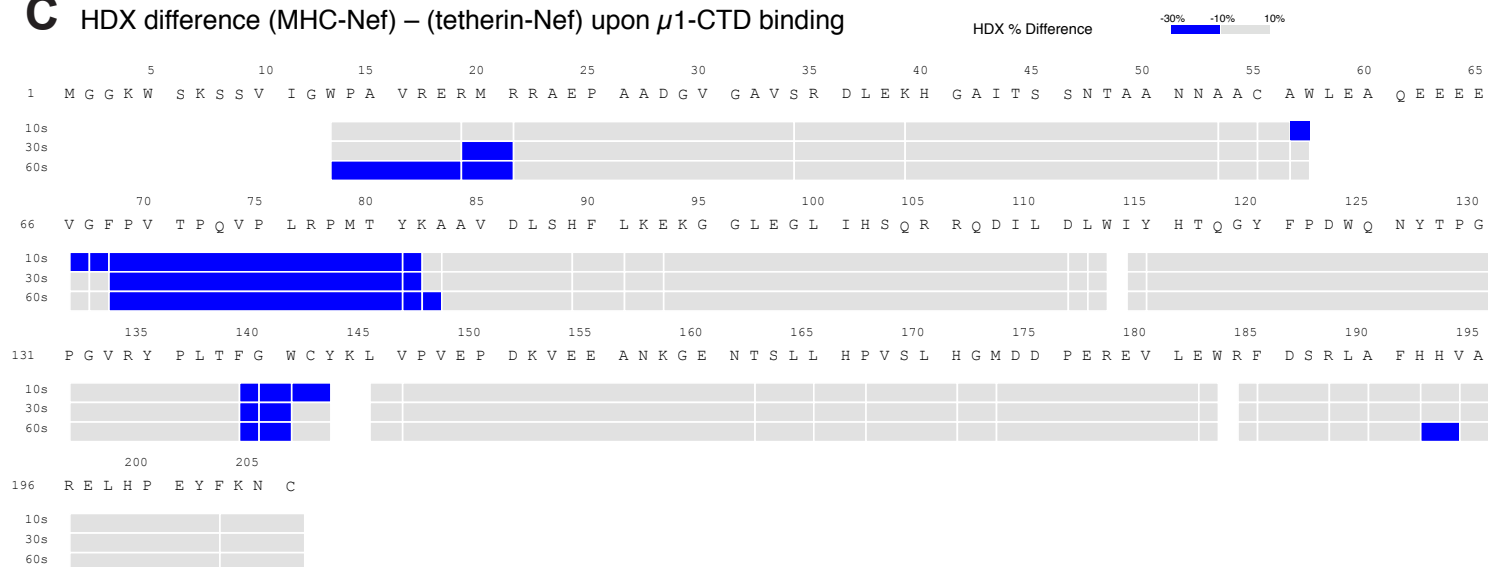

Supplement: NIHMS1500360-supplement-6.pdf [file NIHMS1500360-supplement-6.pdf]
