# Supplementary material
Source: PubMed Central journal article supplement (PMC6091687)
Supplement: NIHMS1500360-supplement-7.pdf [file NIHMS1500360-supplement-7.pdf]

## Supplementary Tables

**Table S1, related to Figure 1. Plasmids used in this study.**

|                                 |                                                                                                              |
|---------------------------------|--------------------------------------------------------------------------------------------------------------|
| AP-1 core                       | Hs AP1S3/His-TEVsite-Hs AP1B1 (1-584)/Mm AP1G (1-595)-TEVsite-GST/Mm AP1M1 in pST44 vector                   |
| AP-1 $\Delta\beta$ Arf          | AP1B1_I85D/V88D in AP-1 core/pST44 construct                                                                 |
| AP-1 $\Delta\gamma$ Arf         | AP1G_L68D/L71E/L102E in AP-1 core/pST44 construct                                                            |
| Arf1                            | His-TEVsite-Hs Arf1 (17-181)-Q71L in pHis2 vector                                                            |
| Tetherin-Nef                    | His-TEVSite-Hs Tetherin (1-21)- GSDEASEGSG-NL4-3 Nef in pHis2 vector                                         |
| Tetherin-Nef_LL/AA              | His-TEVSite-Hs Tetherin (1-21)- GSDEASEGSG-NL4-3 Nef-L164A/L165A in pHis2 vector                             |
| Tetherin-MRCA Nef               | His-TEVSite-Hs Tetherin (1-21)- GSDEASEGSG-O-MRCA Nef in LIC 1B vector                                       |
| MHC-Nef                         | His-TEVSite-Hs MHC-I (338-365)-NL4-3 Nef in pHis2 vector                                                     |
| Nef                             | His-TEVSite-NL4-3 Nef in pHis2 vector                                                                        |
| His-MBP-CK1                     | His-MBP-TEVsite-Rat CK1 $\delta$ (1-317) in LIC 2C-T vector                                                  |
| HIV-1 $\Delta$ Vpu $\Delta$ Nef | NL4-3 HIV-1 provirus with deletion of nt3-nt146 in vpu and aa 1,4 and 5 mutated to stop in nef in pBR vector |
| O-MRCA Nef                      | OMRCA Nef with C-terminal AU1-tag in pCG IRES-eGFP vector                                                    |
| NL4-3 Nef                       | NL4-3 Nef with C-terminal AU1-tag in pCG IRES-eGFP vector                                                    |
| O-MRCA Nef C174S                | OMRCA Nef C174S with C-terminal AU1-tag in pCG IRES-eGFP vector                                              |
| NL4-3 Nef S169A                 | NL4-3 Nef S169A with C-terminal AU1-tag in pCG IRES-eGFP vector                                              |
| Vpu                             | vpu with C-terminal AU1-tag in pCG IRES-eGFP vector                                                          |
| Empty vector control            | nef with stop codon at position 2,3 and 4 in pCG vector                                                      |
| Tetherin                        | human tetherin in pCG vector                                                                                 |

**Table S2, related to Figure 1. EM and model statistics.**

| Map                                             | Wild type<br>Monomer | Wild type<br>Trimer<br>monomeric | Wild type<br>Trimer | Wild type<br>Trimer<br>(stable subset) | Mutant L2A<br>Dimer<br>monomeric | Mutant L2A<br>Dimer |
|-------------------------------------------------|----------------------|----------------------------------|---------------------|----------------------------------------|----------------------------------|---------------------|
| <b>Data collection</b>                          |                      |                                  |                     |                                        |                                  |                     |
| Microscope                                      | FEI Titan Krios      | FEI Titan Krios                  | FEI Titan Krios     | FEI Titan Krios                        | FEI Titan Krios                  | FEI Titan Krios     |
| Voltage (kV)                                    | 300                  | 300                              | 300                 | 300                                    | 300                              | 300                 |
| Detector                                        | Gatan K2             | Gatan K2                         | Gatan K2            | Gatan K2                               | Gatan K2                         | Gatan K2            |
| Recording mode                                  | Super                | Super                            | Super               | Super                                  | Super                            | Super               |
| Magnification                                   | 53,350               | 53,350                           | 53,350              | 53,350                                 | 53,350                           | 53,350              |
| Movie micrograph pixel size (Å)                 | 1.067                | 1.067                            | 1.067               | 1.067                                  | 1.067                            | 1.067               |
| Dose rate (e <sup>-</sup> /Å <sup>2</sup> /sec) | 6.57                 | 6.57                             | 6.57                | 6.57                                   | 7.09                             | 7.09                |
| Number of frames per movie micrograph           | 38                   | 38                               | 38                  | 38                                     | 28                               | 28                  |
| Frame exposure time (ms)                        | 250                  | 250                              | 250                 | 250                                    | 200                              | 200                 |
| Movie exposure time (ms)                        | 9,500                | 9,500                            | 9,500               | 9,500                                  | 5,600                            | 5,600               |
| Total dose (e <sup>-</sup> /Å <sup>2</sup> )    | 62.42                | 62.42                            | 62.42               | 62.42                                  | 39.7                             | 39.7                |
| Defocus range (um)                              | -0.75 to -2.00       | -0.75 to -2.00                   | -0.75 to -2.00      | -0.75 to -2.00                         | -0.75 to -2.50                   | -0.75 to -2.50      |
| <b>EM data processing</b>                       |                      |                                  |                     |                                        |                                  |                     |
| EMDB code                                       | 7455                 | 7457                             | 7458                | 7563                                   | 7453                             | 7454                |
| Complex ordered molecular weight (kDa)          | 233                  | 233                              | 698                 | 698                                    | 466                              | 233                 |
| Number of movies/micrographs                    | 2,200                | 2,200                            | 2,200               | 2,200                                  | 1,989                            | 1,989               |
| Box size (px)                                   | 384                  | 224                              | 384                 | 384                                    | 256                              | 384                 |
| Particle number (total)                         | 252,212              | 252,212                          | 252,212             | 252,212                                | 399,032                          | 399,032             |
| Particle number (post 2D)                       | 209,816              | 209,816                          | 209,816             | 209,816                                | 162,509                          | 162,509             |
| Particle number (post 3D)                       | 53,123               | 61,929                           | 61,929              | 11,108                                 | 85,804                           | 42,902              |
| Particle number (used in final map)             | 53,123               | 53,841                           | 61,929              | 11,108                                 | 85,592                           | 42,902              |
| Refinement angular accuracy (°)                 | 2.61                 | 2.28                             | 2.70                | 1.66                                   | 1.43                             | 1.12                |
| Refinement offset accuracy (Å)                  | 1.34                 | 0.99                             | 1.90                | 1.22                                   | 0.94                             | 0.54                |
| Symmetry                                        | C1                   | C1                               | C1                  | C1                                     | C1                               | C1                  |
| Map resolution (FSC 0.143)                      | 3.90                 | 3.73                             | 4.27                | 6.83                                   | 4.27                             | 6.72                |
| Measured map B-factor (Å <sup>2</sup> )         | -93.6                | -136.6                           | -124.6              | -277.2                                 | -151.2                           | -398.7              |
| CryoEF score                                    | 0.77                 | 0.76                             | 0.78                | 0.70                                   | 0.46                             | 0.47                |
| CryoEF worst/best PSF resolution (Å)            | 4.39/2.29            | 4.58/2.45                        | 4.39/2.45           | 5.20/2.45                              | 7.18/2.18                        | 6.96/2.18           |
| 3DFSC sphericity                                | 0.97                 | 0.99                             | 0.96                | 0.98                                   | 0.77                             | 0.97                |
| <b>Structure Building and Validation</b>        |                      |                                  |                     |                                        |                                  |                     |
| PDB ID                                          | 6DFF                 | 6CM9                             |                     | 6CRI                                   | 6D83                             | 6D84                |
| Number of atoms in deposited model              | 16,594               | 17,683                           |                     | 53,049                                 | 16,588                           | 33,176              |
| MolProbity clashscore, all atoms                | 4.64                 | 5.85                             |                     | 11.73                                  | 6.08                             | 8.05                |
| MolProbity score                                | 1.59                 | 1.81                             |                     | 1.94                                   | 1.69                             | 1.76                |
| EMRinger score                                  | 2.07                 | 2.28                             |                     | -                                      | 1.15                             | -                   |
| Refinement program                              | Phenix               | Phenix                           |                     | Phenix                                 | Phenix                           | Phenix              |
| RMSD from ideal                                 |                      |                                  |                     |                                        |                                  |                     |
| Bond length (Å)                                 | 0.01                 | 0.01                             |                     | 0.01                                   | 0.01                             | 0.01                |
| Bond angles (°)                                 | 1.17                 | 1.32                             |                     | 1.23                                   | 1.19                             | 1.16                |
| Ramachandran plot                               |                      |                                  |                     |                                        |                                  |                     |
| Favored (%)                                     | 94.9                 | 92.0                             |                     | 94.8                                   | 95.0                             | 95.4                |
| Allowed (%)                                     | 5.1                  | 8.0                              |                     | 5.2                                    | 5.0                              | 4.6                 |
| Outliers (%)                                    | 0.0                  | 0.0                              |                     | 0.0                                    | 0.0                              | 0.0                 |
| Favored rotamers (%)                            | 100.0                | 99.7                             |                     | 99.9                                   | 100.0                            | 99.9                |
| Average atomic                                  | 84.6                 | 29.3                             |                     | 425.2                                  | 89.2                             | 381.7               |
| FSC (0.5) model-vs-map                          | 3.99                 | 3.85                             |                     | 8.04                                   | 4.35                             | 8.93                |
| CC model-vs-map (masked)                        | 0.81                 | 0.76                             |                     | 0.79                                   | 0.76                             | 0.69                |
