# Supplementary material
Source: PubMed Central journal article supplement (PMC6091687)

# Morris et al. Figure S2.

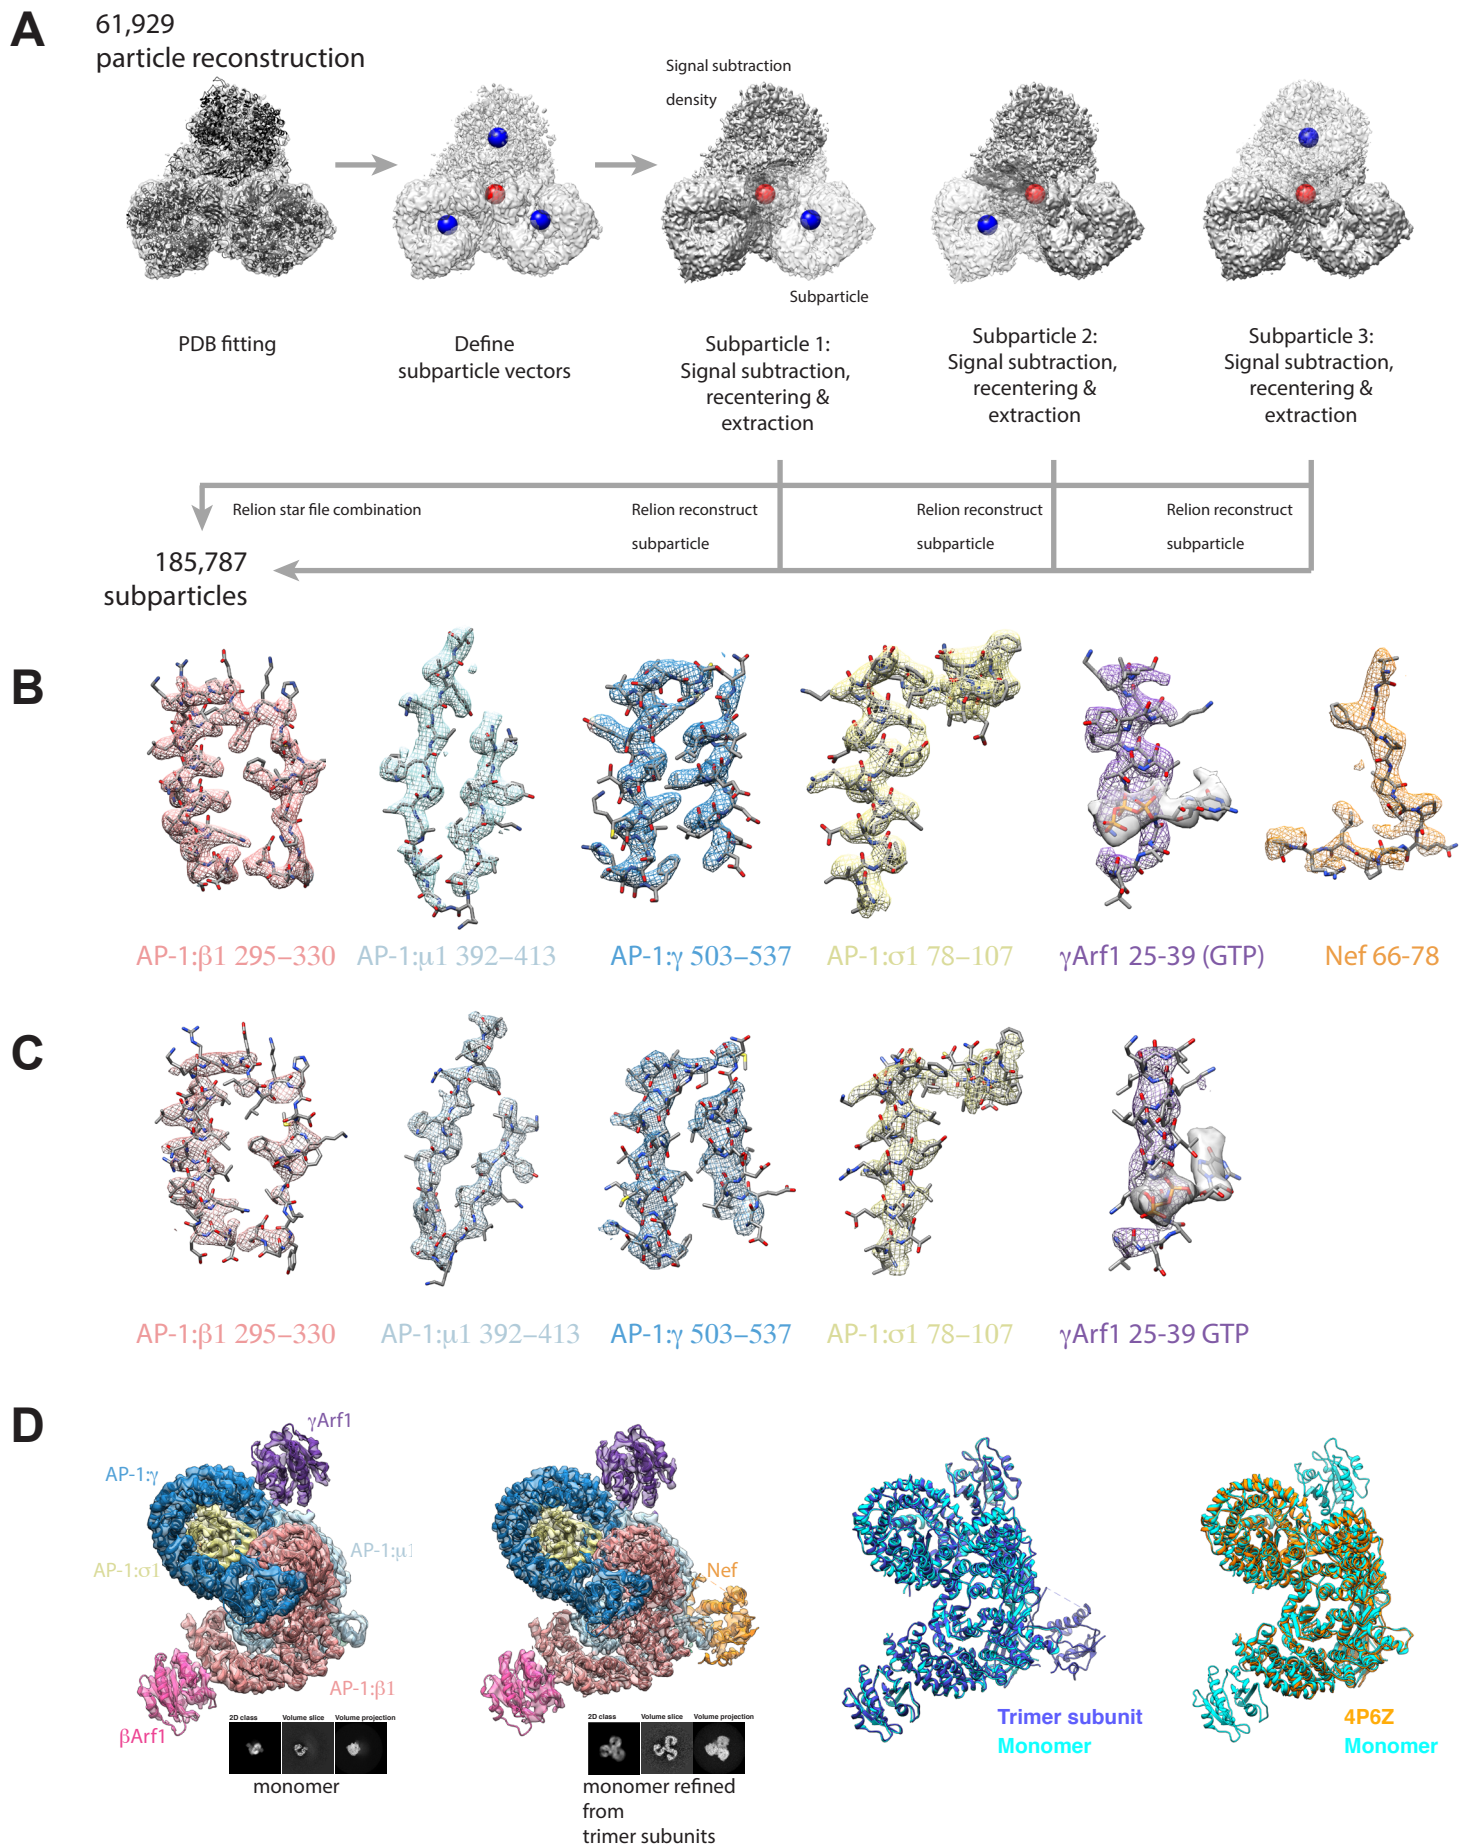

Supplement: NIHMS1500360-supplement-2.pdf [file NIHMS1500360-supplement-2.pdf]

Morris et al. Figure S4.

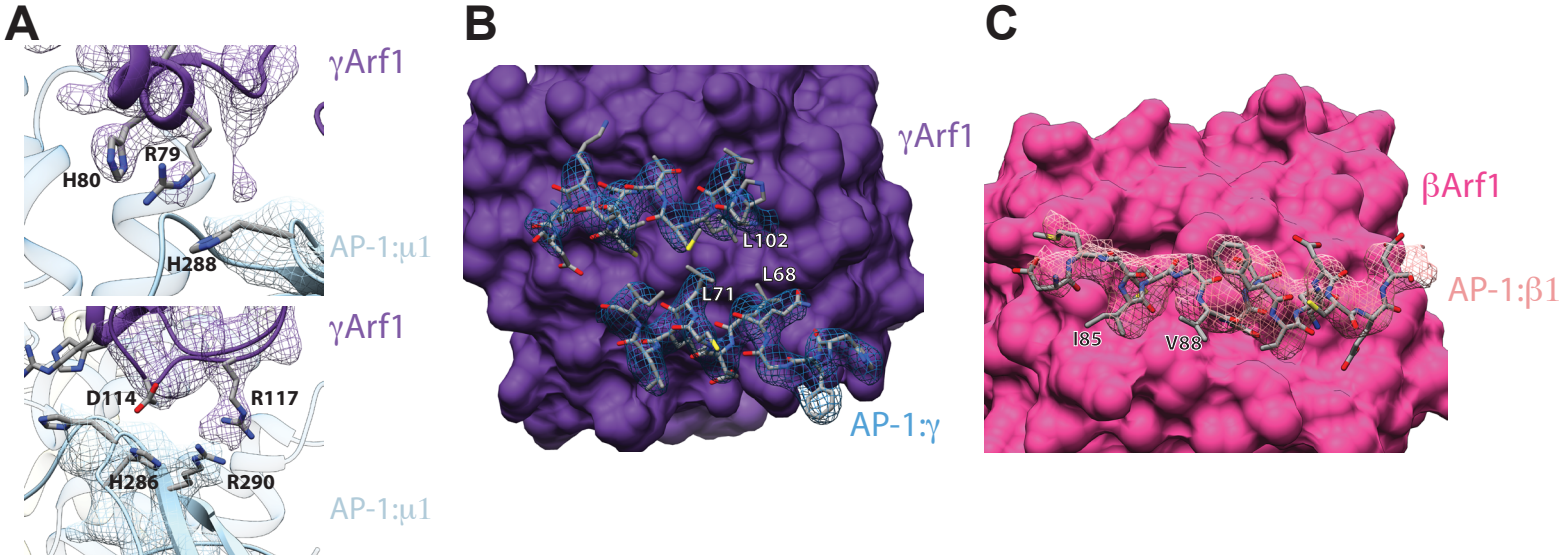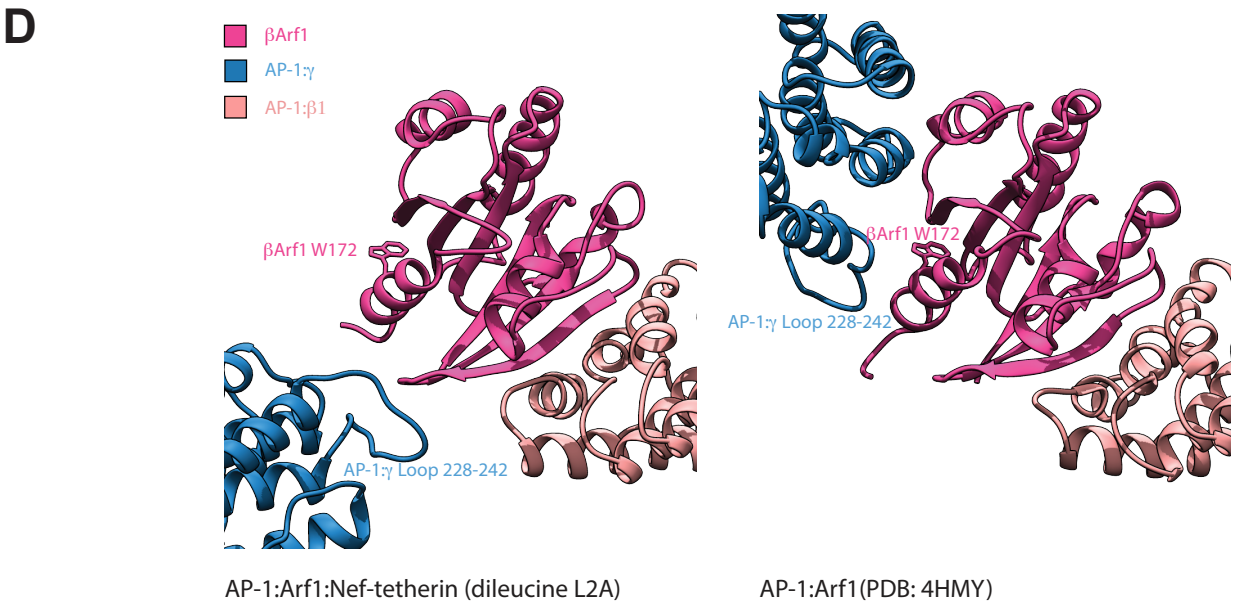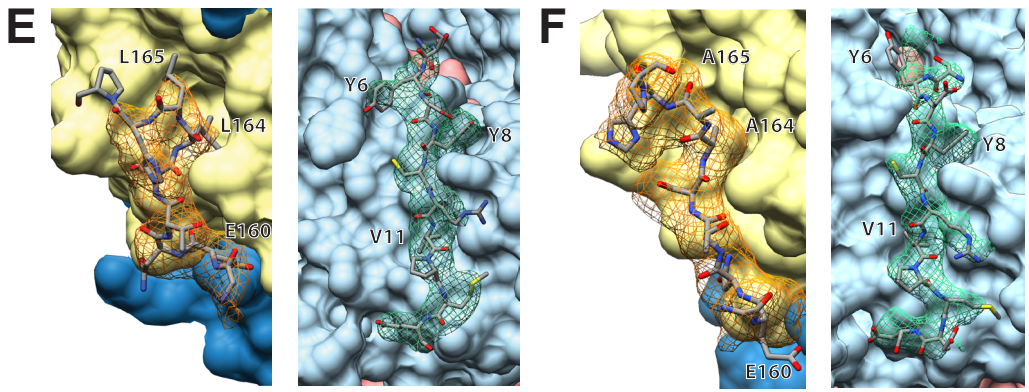

Supplement: NIHMS1500360-supplement-4.pdf [file NIHMS1500360-supplement-4.pdf]

# Morris et al. Figure S5.

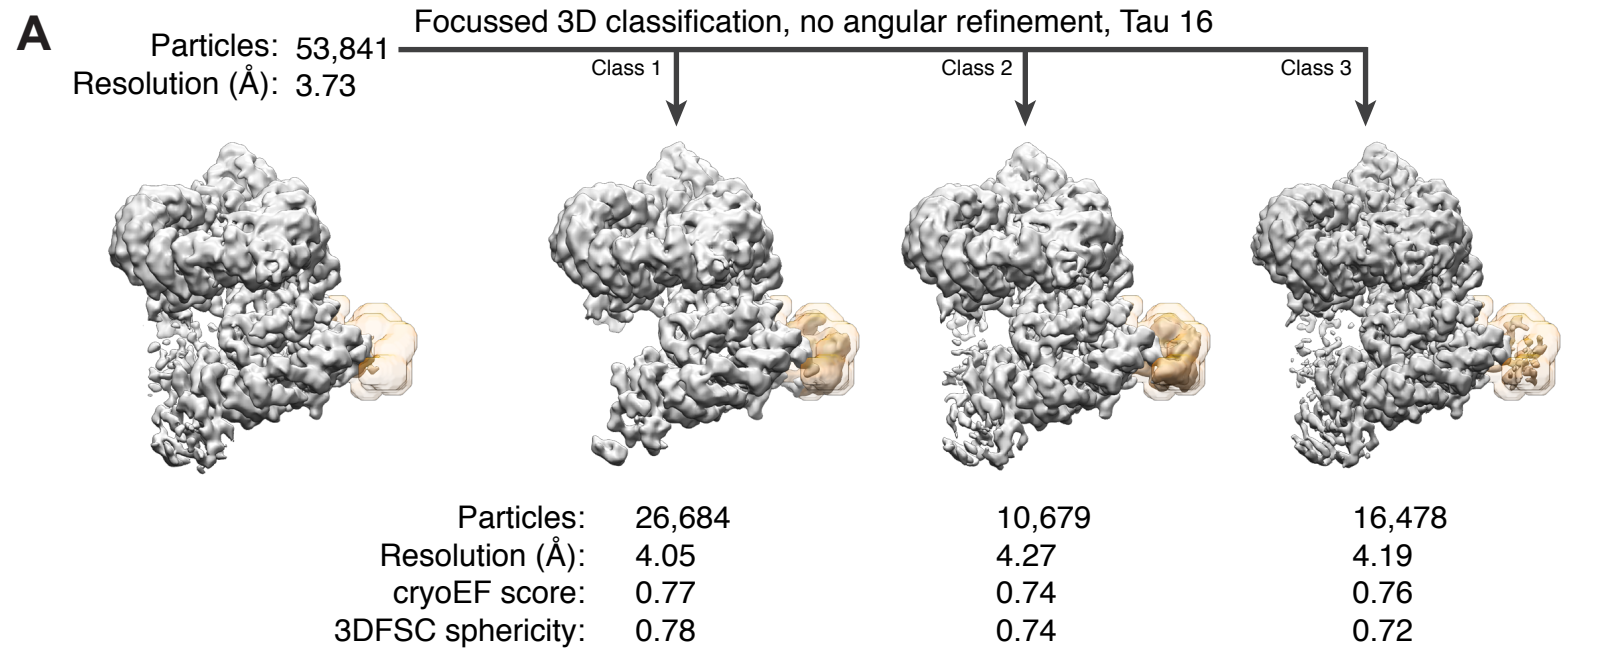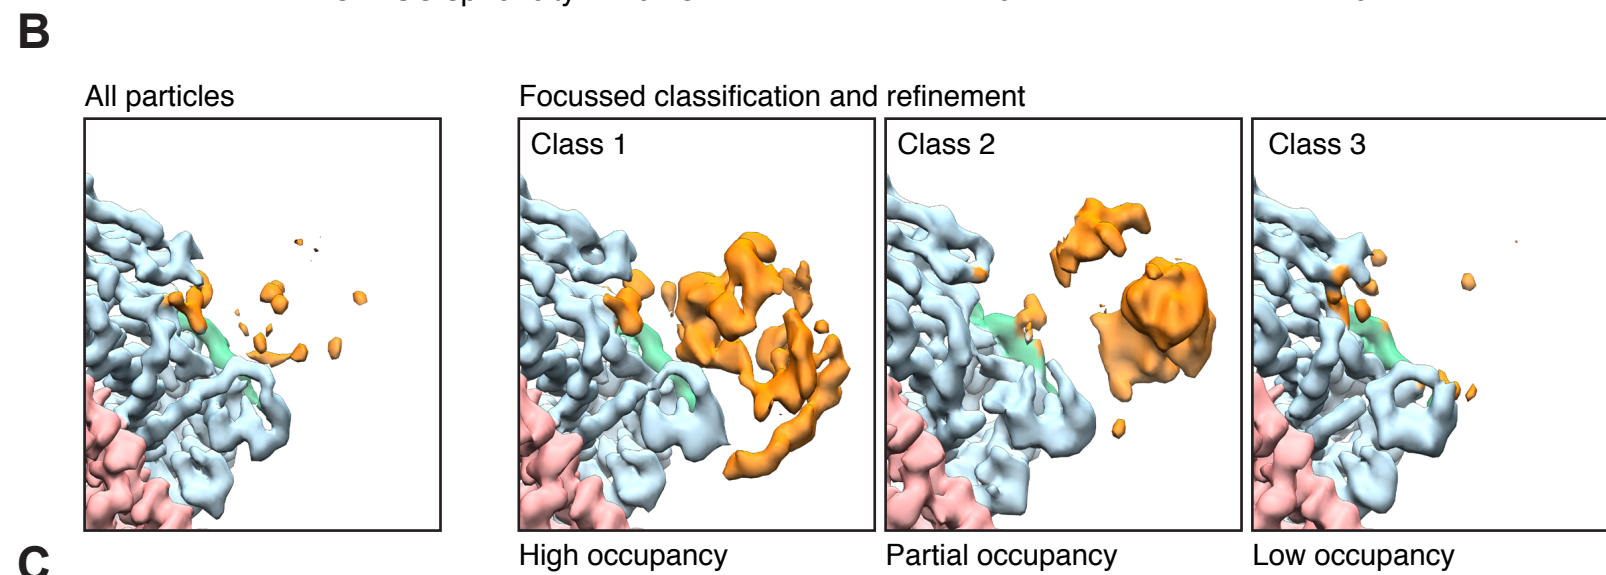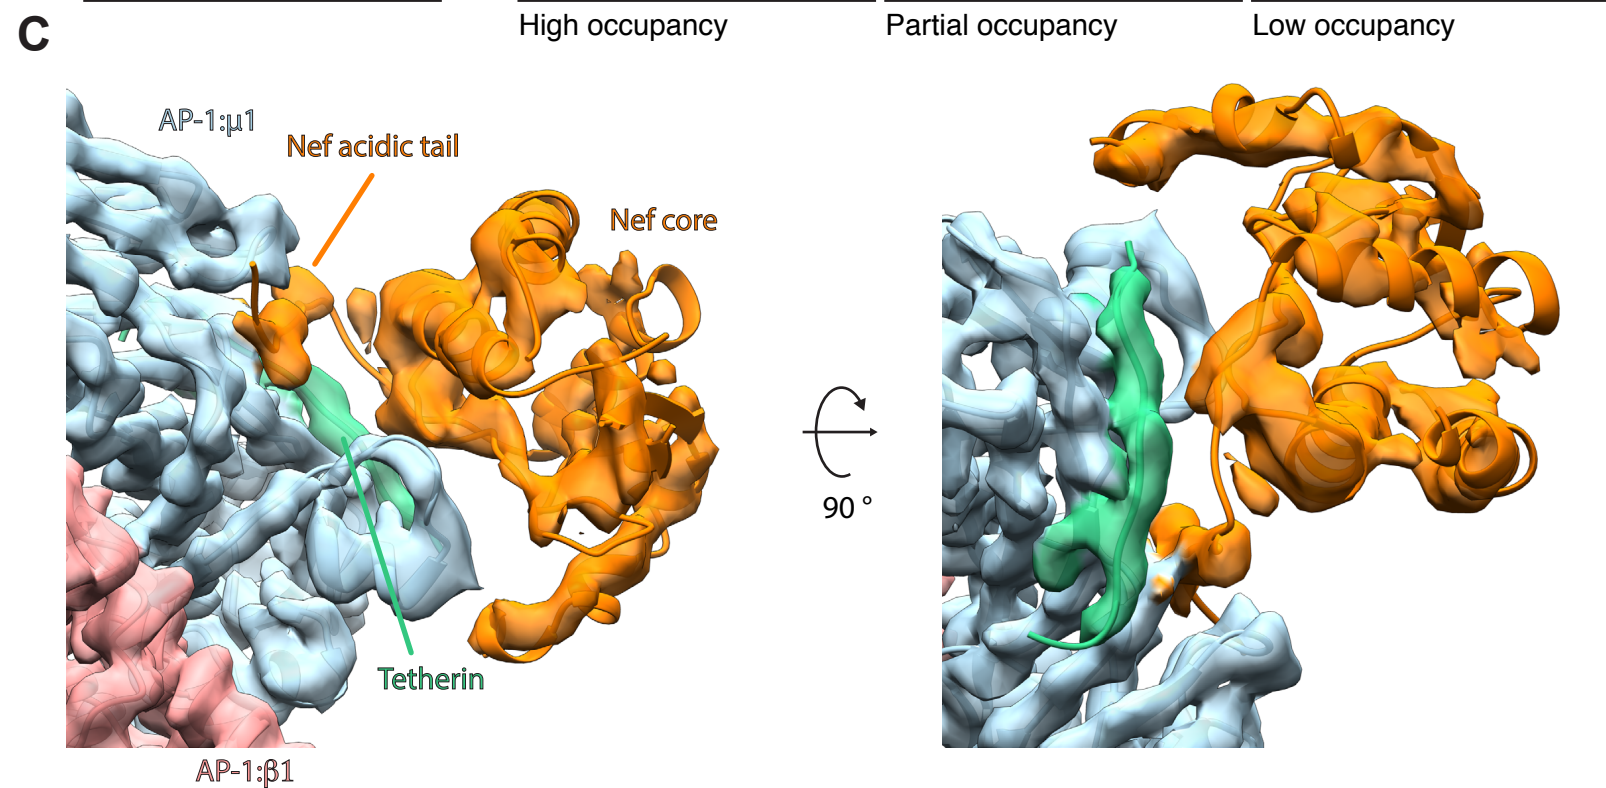

Supplement: NIHMS1500360-supplement-5.pdf [file NIHMS1500360-supplement-5.pdf]
